# Supplementary material
Source: PubMed Central journal article supplement (PMC2481576)
Supplement: neo1008_0897SD1.pdf [file neo1008_0897SD1.pdf]

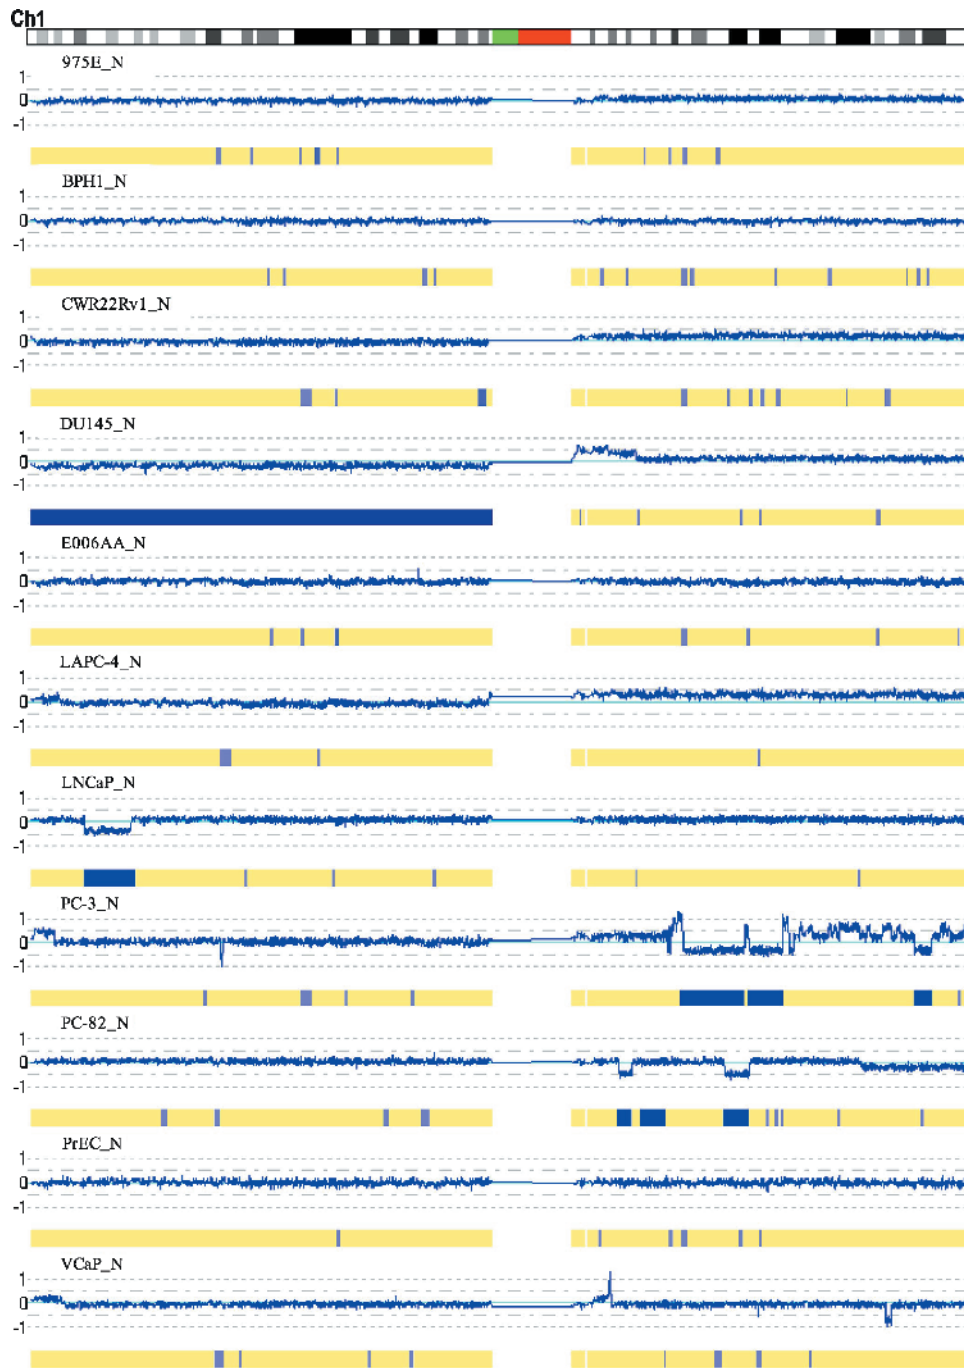

**Figure W1.** Maps of DNA copy number alterations and LOH generated by CNAG2.0 for chromosomes 1 (W1) to X (WX) in prostate cell lines.  $\log_2$  ratios (horizontal dotted lines) are labeled for each of the chromosomes on the left as 1, 0, and  $-1$ , with 0 being the baseline (light blue). Dark blue curve indicates 10-SNP genomic smoothed  $\log_2$  ratios of Nsp probes. Blue bars superimposed on the yellow bars represent LOH likelihood with the gradients as shown in Figure 1. Red arrows indicate DNA copy number variations.

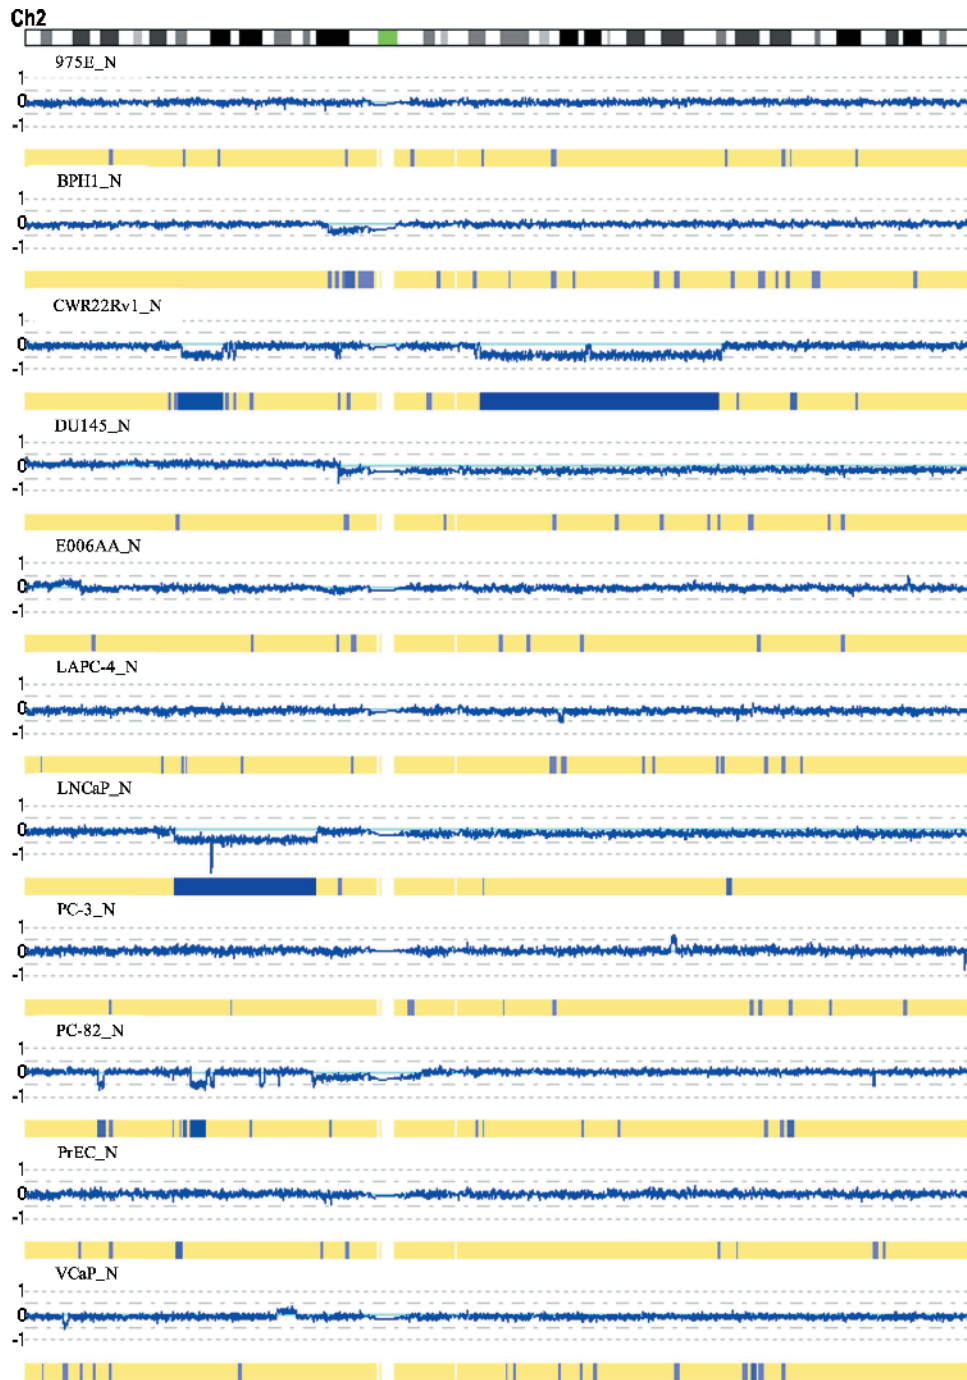

**Figure W2.** Maps of DNA copy number alterations and LOH generated by CNAG2.0 for chromosomes 1 (W1) to X (WX) in prostate cell lines.  $\log_2$  ratios (horizontal dotted lines) are labeled for each of the chromosomes on the left as 1, 0, and -1, with 0 being the baseline (light blue). Dark blue curve indicates 10-SNP genomic smoothed  $\log_2$  ratios of Nsp probes. Blue bars superimposed on the yellow bars represent LOH likelihood with the gradients as shown in Figure 1. Red arrows indicate DNA copy number variations.

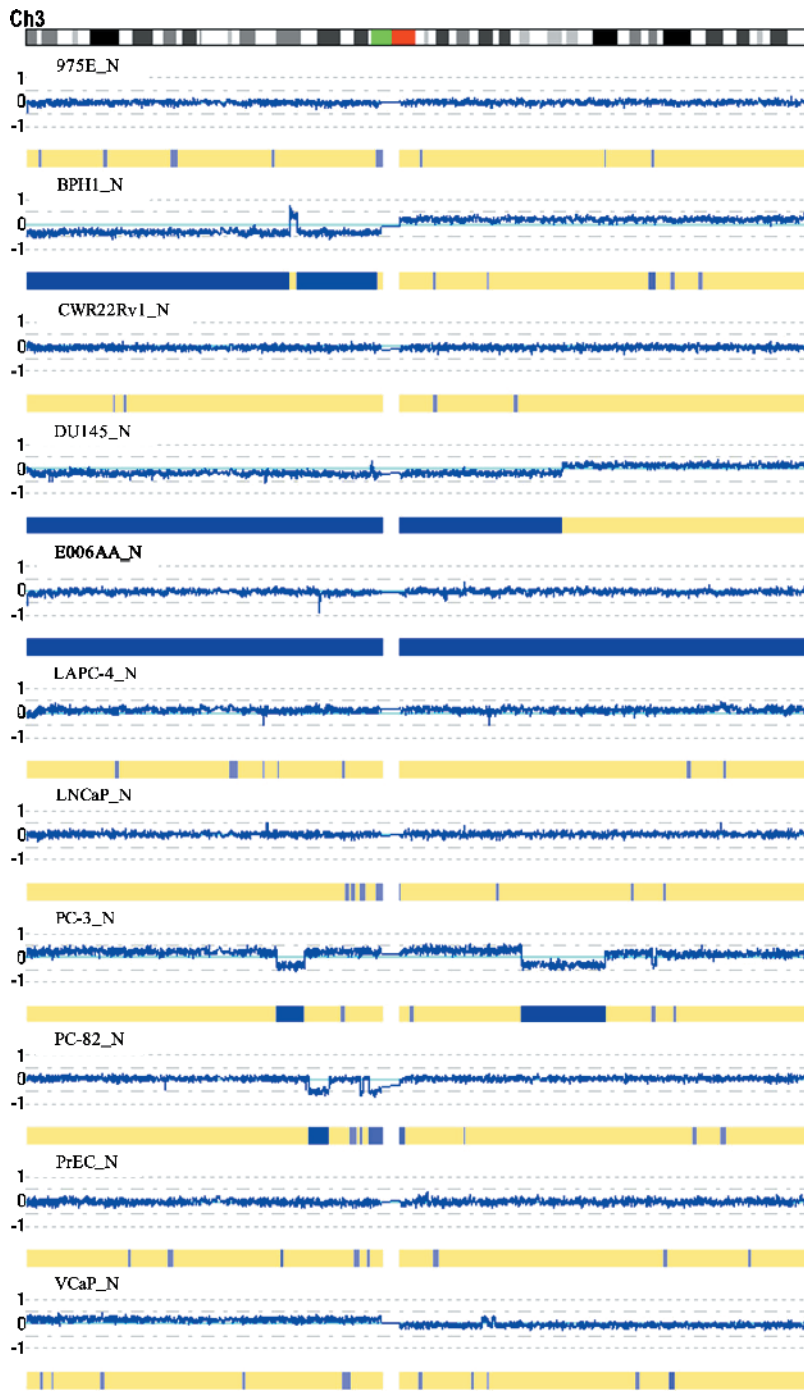

**Figure W3.** Maps of DNA copy number alterations and LOH generated by CNAG2.0 for chromosomes 1 (W1) to X (WX) in prostate cell lines.  $\log_2$  ratios (horizontal dotted lines) are labeled for each of the chromosomes on the left as 1, 0, and  $-1$ , with 0 being the baseline (light blue). Dark blue curve indicates 10-SNP genomic smoothed  $\log_2$  ratios of Nsp probes. Blue bars superimposed on the yellow bars represent LOH likelihood with the gradients as shown in Figure 1. Red arrows indicate DNA copy number variations.

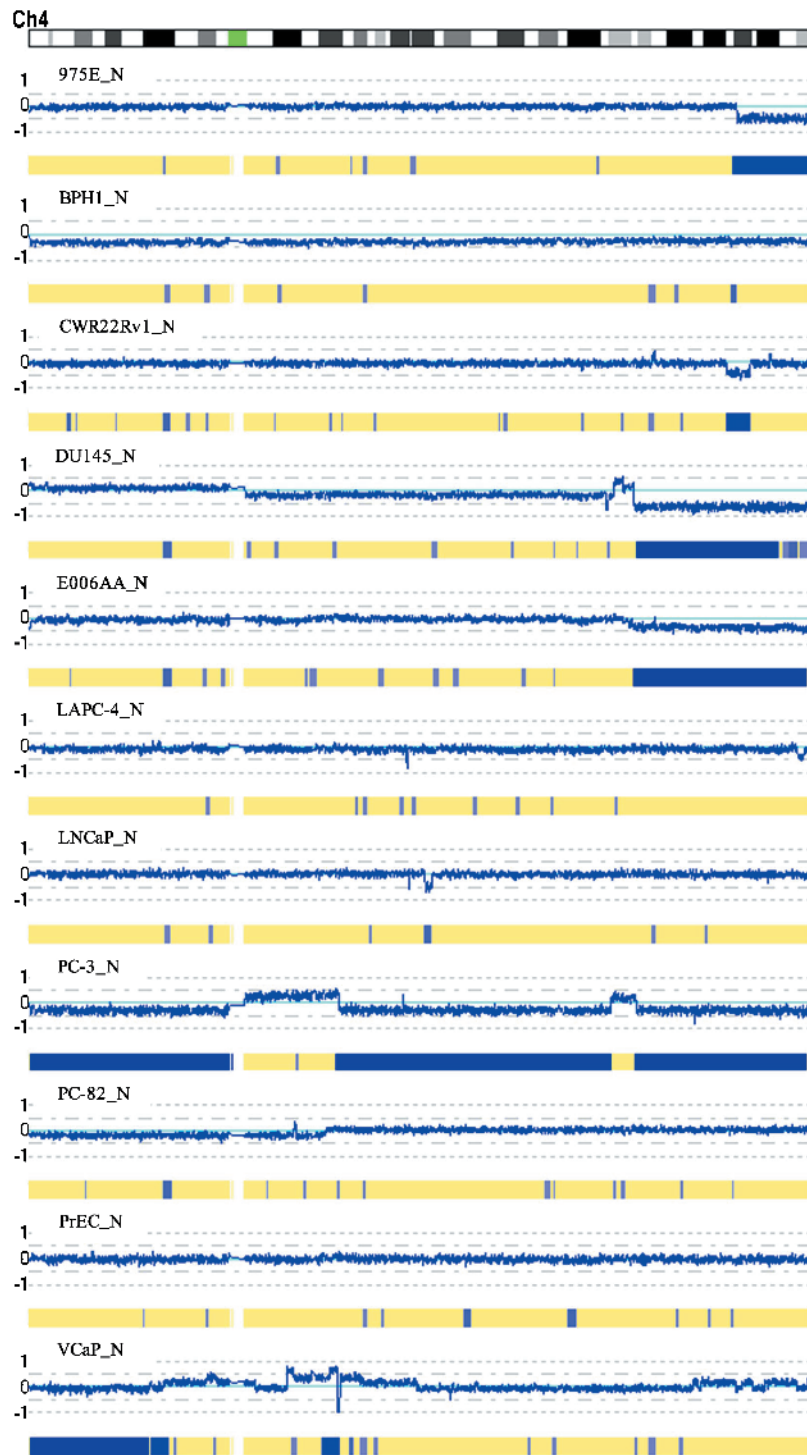

**Figure W4.** Maps of DNA copy number alterations and LOH generated by CNAG2.0 for chromosomes 1 (W1) to X (WX) in prostate cell lines.  $\log_2$  ratios (horizontal dotted lines) are labeled for each of the chromosomes on the left as 1, 0, and  $-1$ , with 0 being the baseline (light blue). Dark blue curve indicates 10-SNP genomic smoothed  $\log_2$  ratios of Nsp probes. Blue bars superimposed on the yellow bars represent LOH likelihood with the gradients as shown in Figure 1. Red arrows indicate DNA copy number variations.

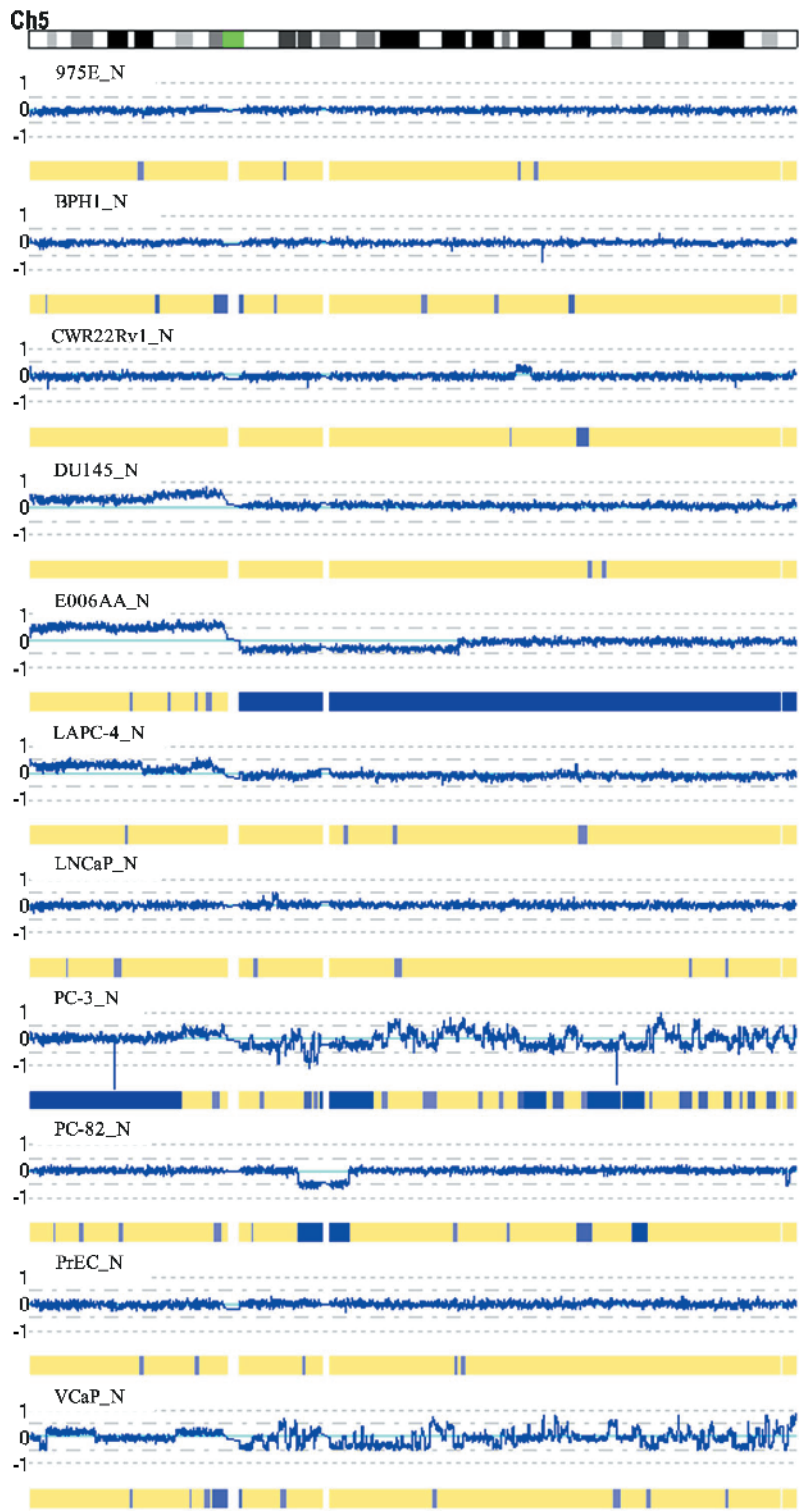

**Figure W5.** Maps of DNA copy number alterations and LOH generated by CNAG2.0 for chromosomes 1 (W1) to X (WX) in prostate cell lines. Log<sub>2</sub> ratios (horizontal dotted lines) are labeled for each of the chromosomes on the left as 1, 0, and -1, with 0 being the baseline (light blue). Dark blue curve indicates 10-SNP genomic smoothed log<sub>2</sub> ratios of Nsp probes. Blue bars superimposed on the yellow bars represent LOH likelihood with the gradients as shown in Figure 1. Red arrows indicate DNA copy number variations.

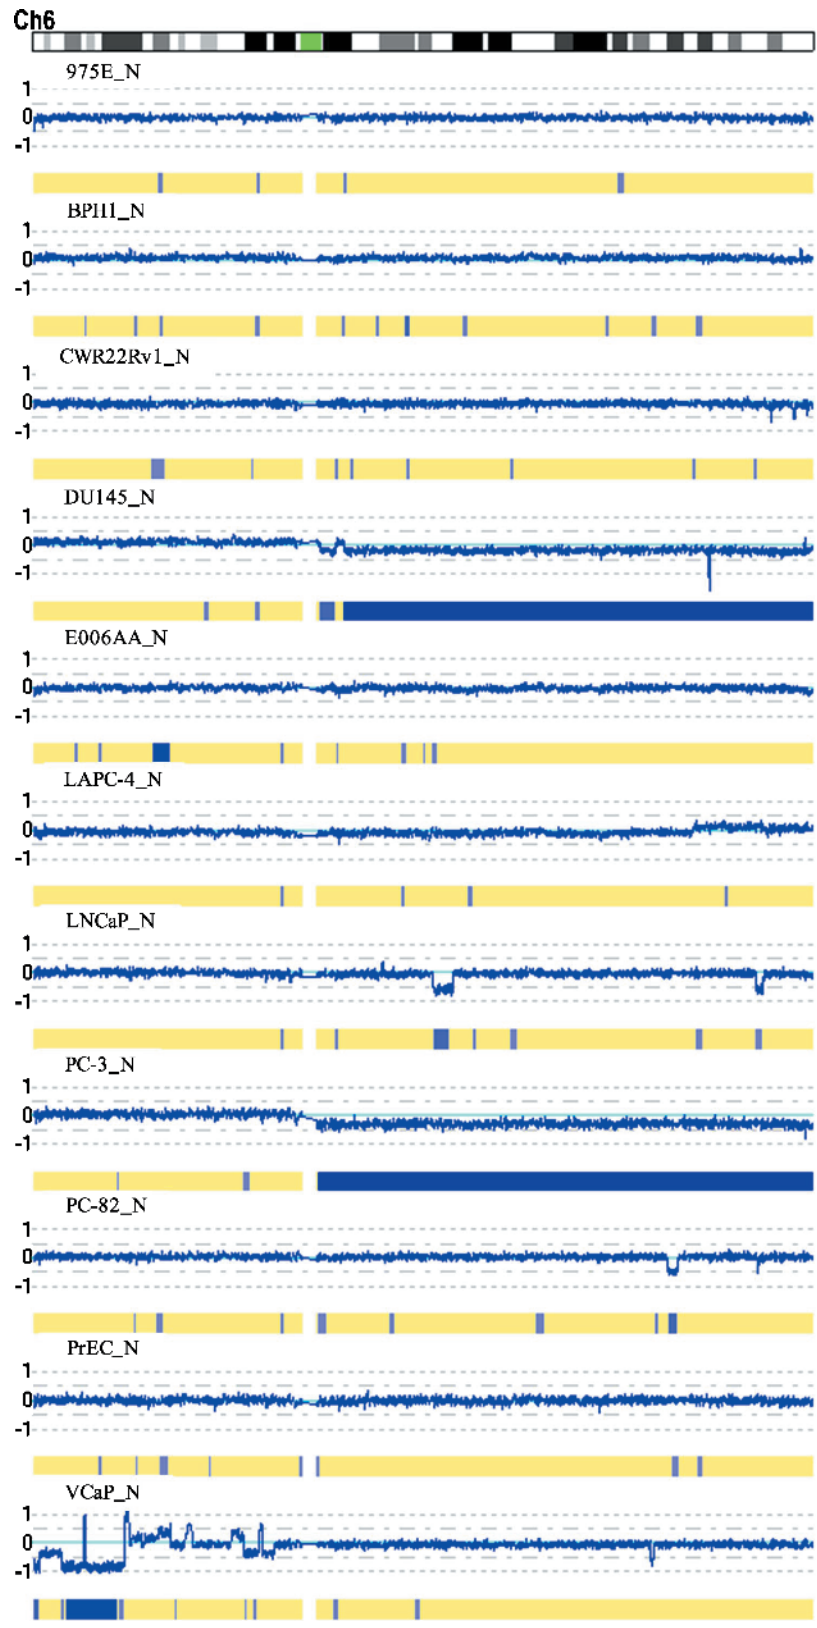

**Figure W6.** Maps of DNA copy number alterations and LOH generated by CNAG2.0 for chromosomes 1 (W1) to X (WX) in prostate cell lines.  $\log_2$  ratios (horizontal dotted lines) are labeled for each of the chromosomes on the left as 1, 0, and  $-1$ , with 0 being the baseline (light blue). Dark blue curve indicates 10-SNP genomic smoothed  $\log_2$  ratios of Nsp probes. Blue bars superimposed on the yellow bars represent LOH likelihood with the gradients as shown in Figure 1. Red arrows indicate DNA copy number variations.

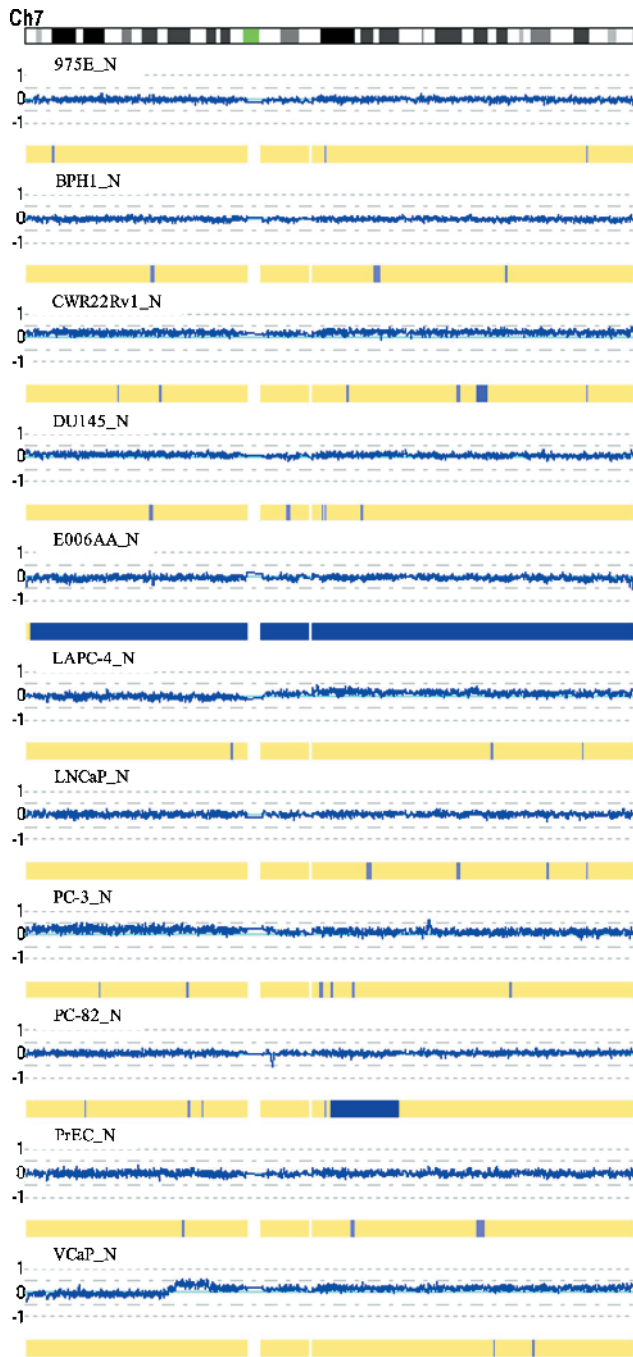

**Figure W7.** Maps of DNA copy number alterations and LOH generated by CNAG2.0 for chromosomes 1 (W1) to X (WX) in prostate cell lines.  $\log_2$  ratios (horizontal dotted lines) are labeled for each of the chromosomes on the left as 1, 0, and  $-1$ , with 0 being the baseline (light blue). Dark blue curve indicates 10-SNP genomic smoothed  $\log_2$  ratios of Nsp probes. Blue bars superimposed on the yellow bars represent LOH likelihood with the gradients as shown in Figure 1. Red arrows indicate DNA copy number variations.

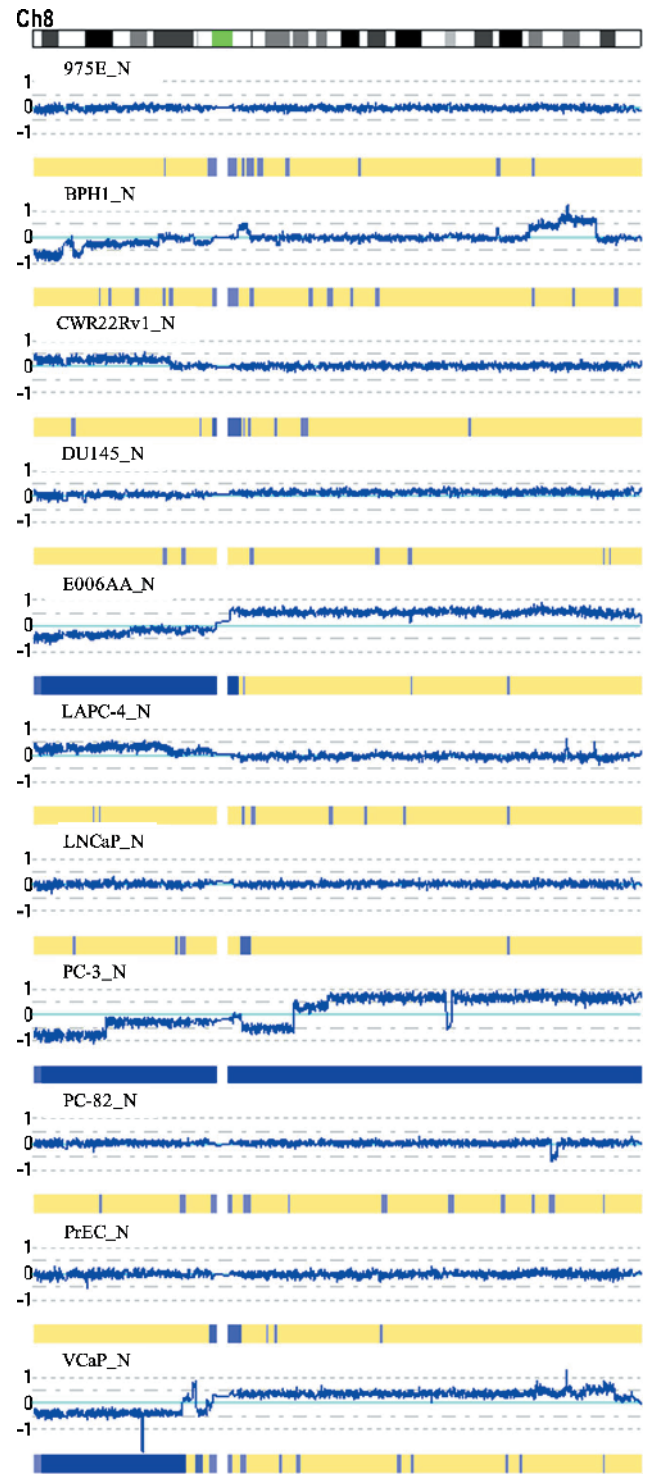

**Figure W8.** Maps of DNA copy number alterations and LOH generated by CNAG2.0 for chromosomes 1 (W1) to X (WX) in prostate cell lines.  $\log_2$  ratios (horizontal dotted lines) are labeled for each of the chromosomes on the left as 1, 0, and  $-1$ , with 0 being the baseline (light blue). Dark blue curve indicates 10-SNP genomic smoothed  $\log_2$  ratios of Nsp probes. Blue bars superimposed on the yellow bars represent LOH likelihood with the gradients as shown in Figure 1. Red arrows indicate DNA copy number variations.

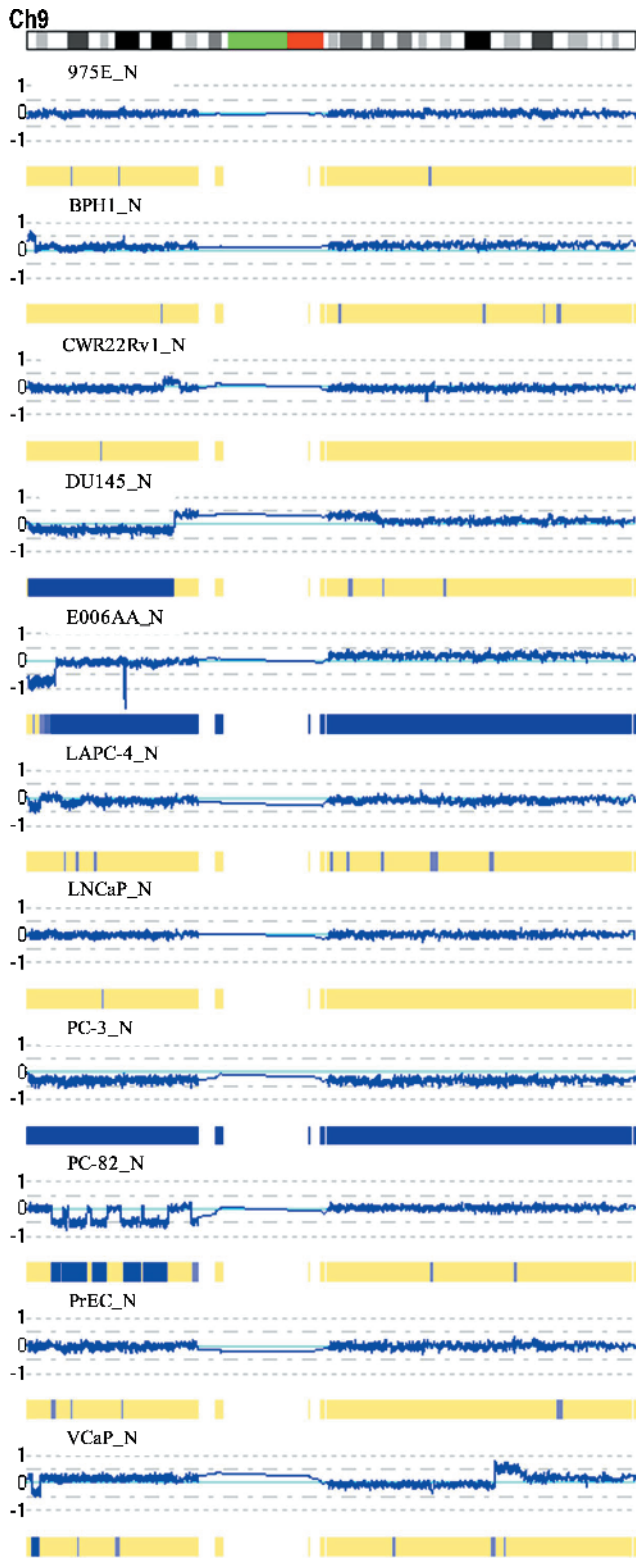

**Figure W9.** Maps of DNA copy number alterations and LOH generated by CNAG2.0 for chromosomes 1 (W1) to X (WX) in prostate cell lines. Log<sub>2</sub> ratios (horizontal dotted lines) are labeled for each of the chromosomes on the left as 1, 0, and -1, with 0 being the baseline (light blue). Dark blue curve indicates 10-SNP genomic smoothed log<sub>2</sub> ratios of Nsp probes. Blue bars superimposed on the yellow bars represent LOH likelihood with the gradients as shown in Figure 1. Red arrows indicate DNA copy number variations.

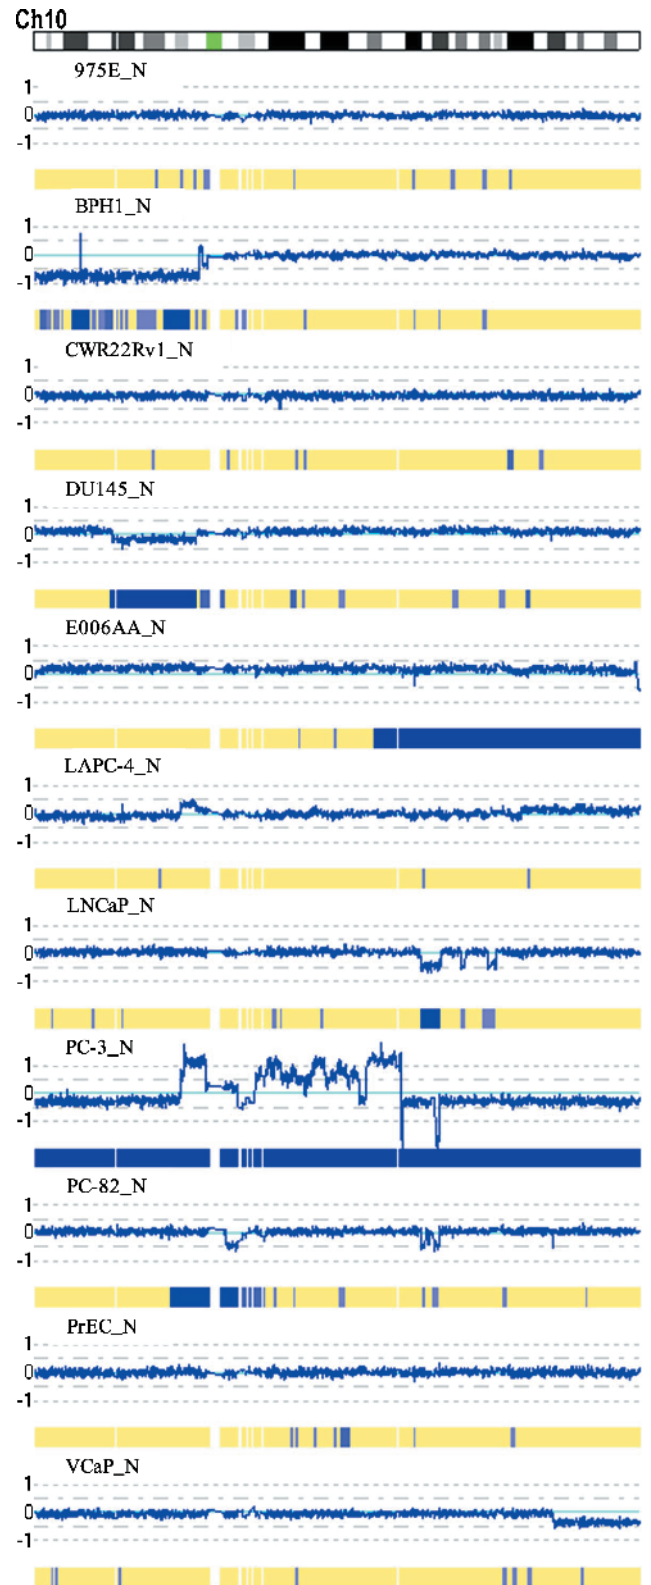

**Figure W10.** Maps of DNA copy number alterations and LOH generated by CNAG2.0 for chromosomes 1 (W1) to X (WX) in prostate cell lines. Log<sub>2</sub> ratios (horizontal dotted lines) are labeled for each of the chromosomes on the left as 1, 0, and -1, with 0 being the baseline (light blue). Dark blue curve indicates 10-SNP genomic smoothed log<sub>2</sub> ratios of Nsp probes. Blue bars superimposed on the yellow bars represent LOH likelihood with the gradients as shown in Figure 1. Red arrows indicate DNA copy number variations.



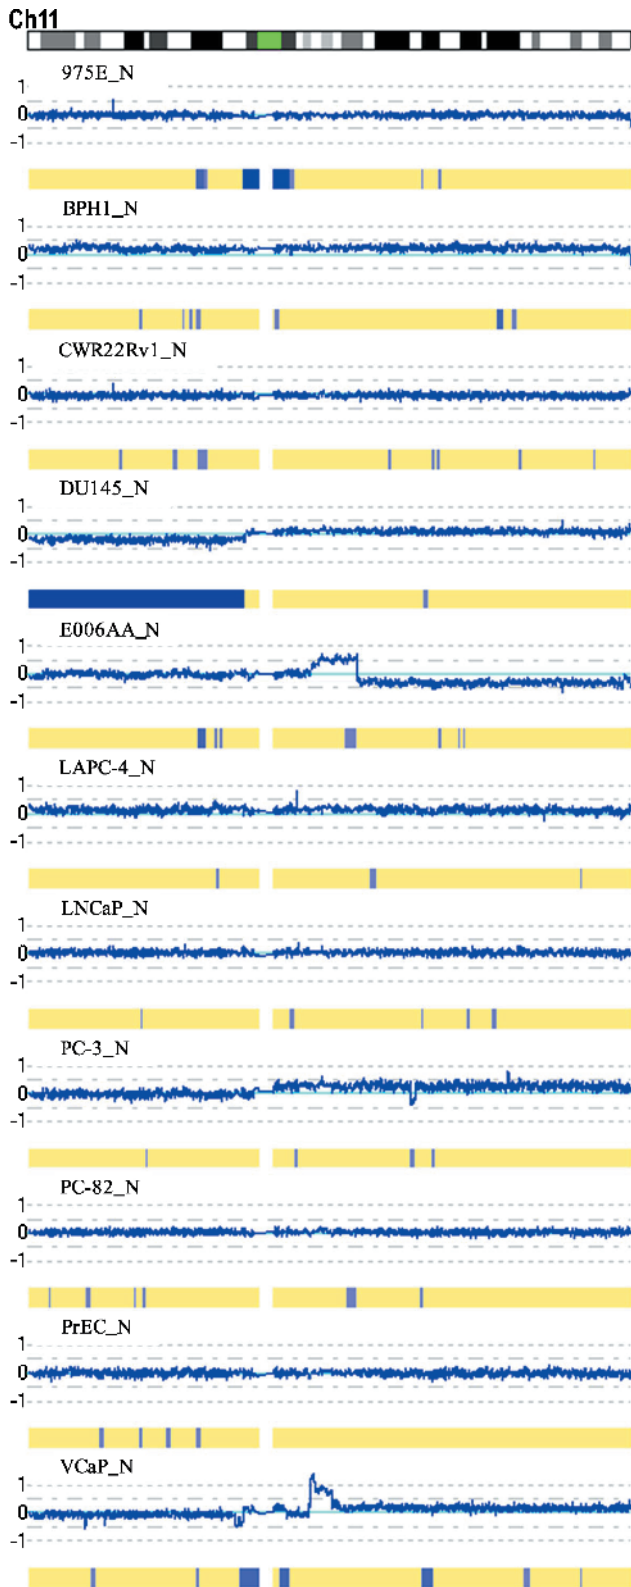

**Figure W11.** Maps of DNA copy number alterations and LOH generated by CNAG2.0 for chromosomes 1 (W1) to X (WX) in prostate cell lines. Log<sub>2</sub> ratios (horizontal dotted lines) are labeled for each of the chromosomes on the left as 1, 0, and -1, with 0 being the baseline (light blue). Dark blue curve indicates 10-SNP genomic smoothed log<sub>2</sub> ratios of Nsp probes. Blue bars superimposed on the yellow bars represent LOH likelihood with the gradients as shown in Figure 1. Red arrows indicate DNA copy number variations.

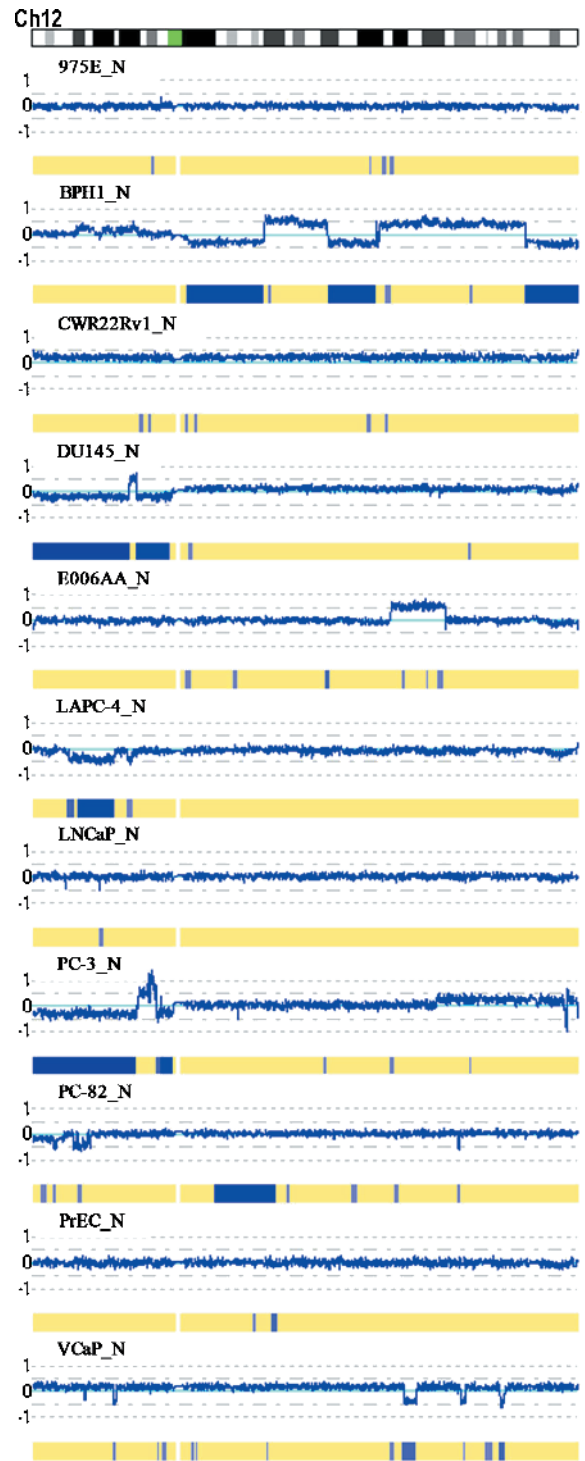

**Figure W12.** Maps of DNA copy number alterations and LOH generated by CNAG2.0 for chromosomes 1 (W1) to X (WX) in prostate cell lines. Log<sub>2</sub> ratios (horizontal dotted lines) are labeled for each of the chromosomes on the left as 1, 0, and -1, with 0 being the baseline (light blue). Dark blue curve indicates 10-SNP genomic smoothed log<sub>2</sub> ratios of Nsp probes. Blue bars superimposed on the yellow bars represent LOH likelihood with the gradients as shown in Figure 1. Red arrows indicate DNA copy number variations.

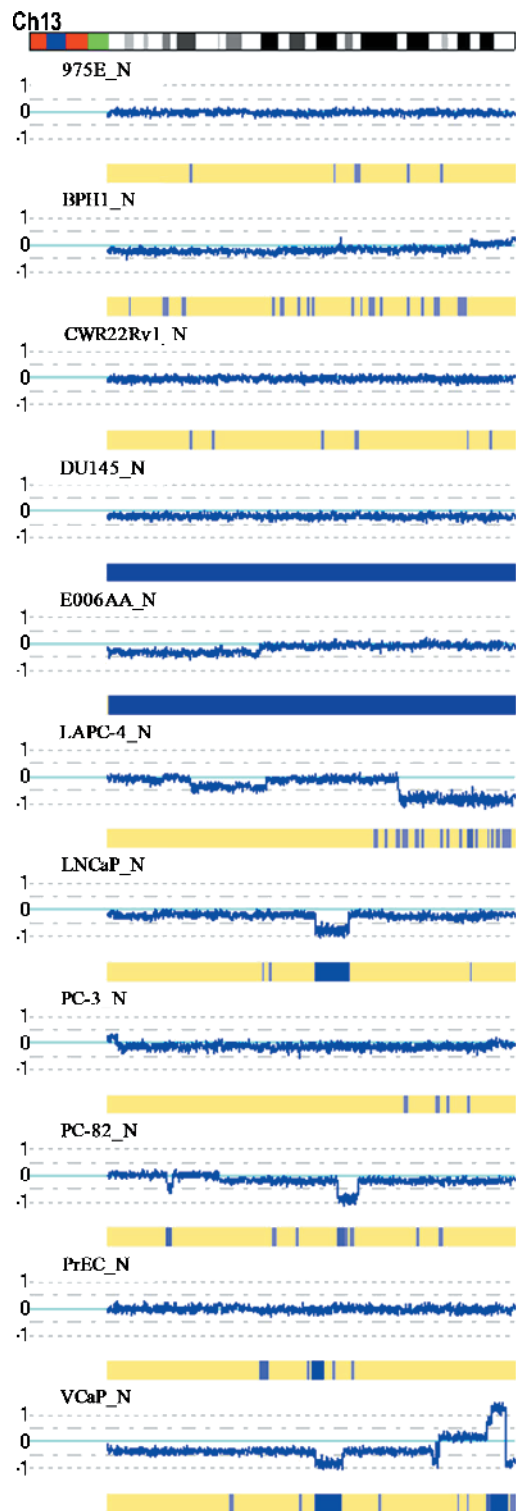

**Figure W13.** Maps of DNA copy number alterations and LOH generated by CNAG2.0 for chromosomes 1 (W1) to X (WX) in prostate cell lines. Log<sub>2</sub> ratios (horizontal dotted lines) are labeled for each of the chromosomes on the left as 1, 0, and -1, with 0 being the baseline (light blue). Dark blue curve indicates 10-SNP genomic smoothed log<sub>2</sub> ratios of Nsp probes. Blue bars superimposed on the yellow bars represent LOH likelihood with the gradients as shown in Figure 1. Red arrows indicate DNA copy number variations.

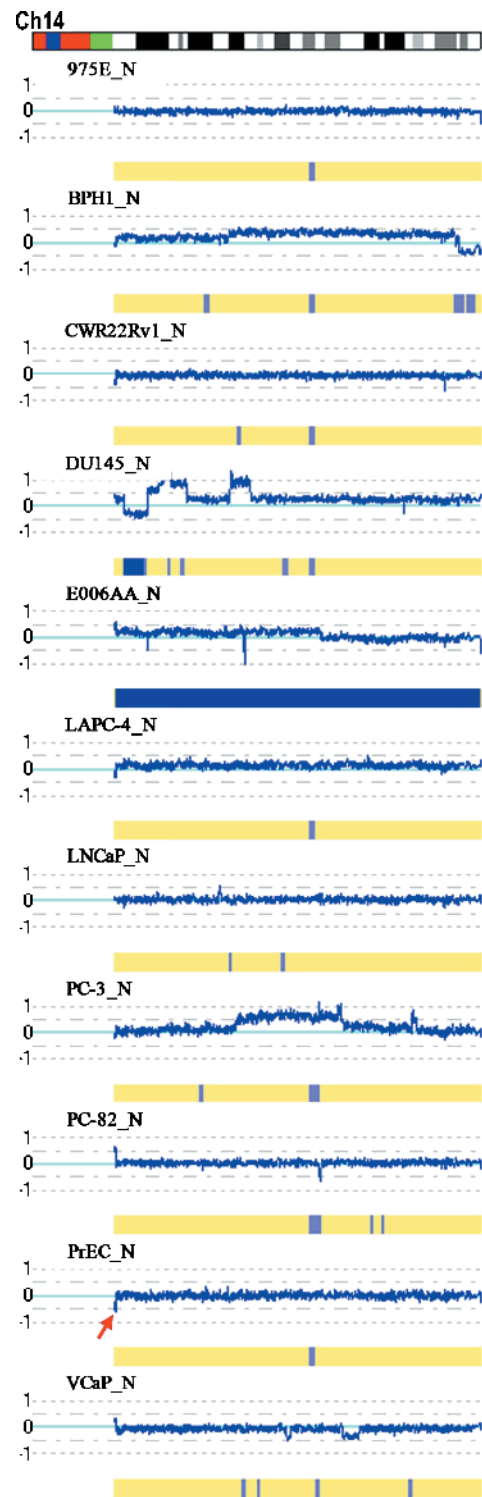

**Figure W14.** Maps of DNA copy number alterations and LOH generated by CNAG2.0 for chromosomes 1 (W1) to X (WX) in prostate cell lines. Log<sub>2</sub> ratios (horizontal dotted lines) are labeled for each of the chromosomes on the left as 1, 0, and -1, with 0 being the baseline (light blue). Dark blue curve indicates 10-SNP genomic smoothed log<sub>2</sub> ratios of Nsp probes. Blue bars superimposed on the yellow bars represent LOH likelihood with the gradients as shown in Figure 1. Red arrows indicate DNA copy number variations.

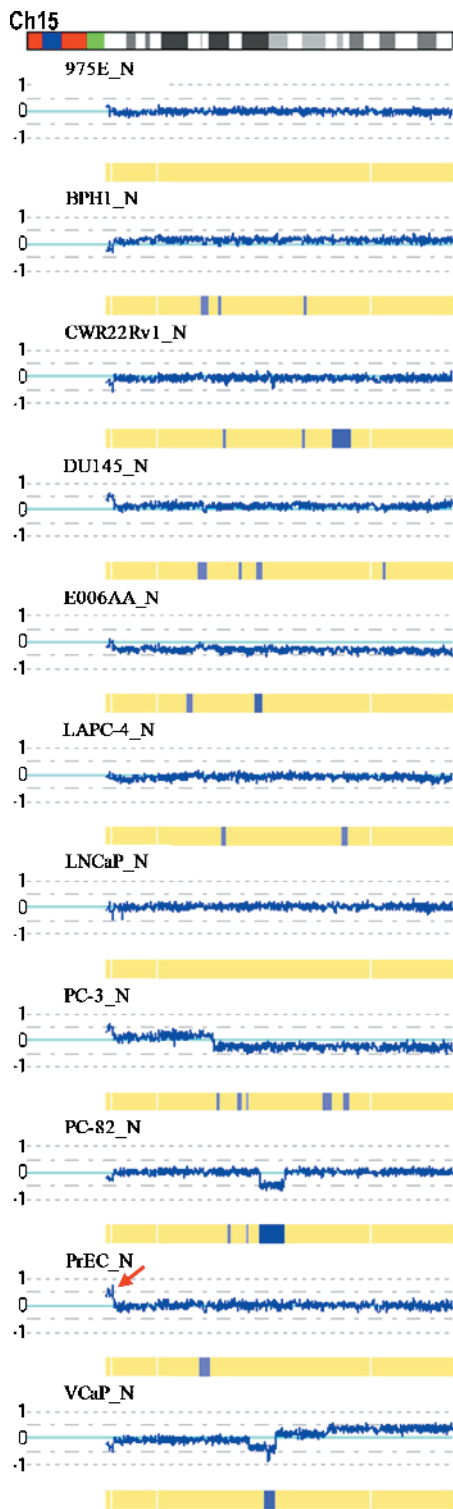

**Figure W15.** Maps of DNA copy number alterations and LOH generated by CNAG2.0 for chromosomes 1 (W1) to X (WX) in prostate cell lines.  $\log_2$  ratios (horizontal dotted lines) are labeled for each of the chromosomes on the left as 1, 0, and  $-1$ , with 0 being the baseline (light blue). Dark blue curve indicates 10-SNP genomic smoothed  $\log_2$  ratios of Nsp probes. Blue bars superimposed on the yellow bars represent LOH likelihood with the gradients as shown in Figure 1. Red arrows indicate DNA copy number variations.

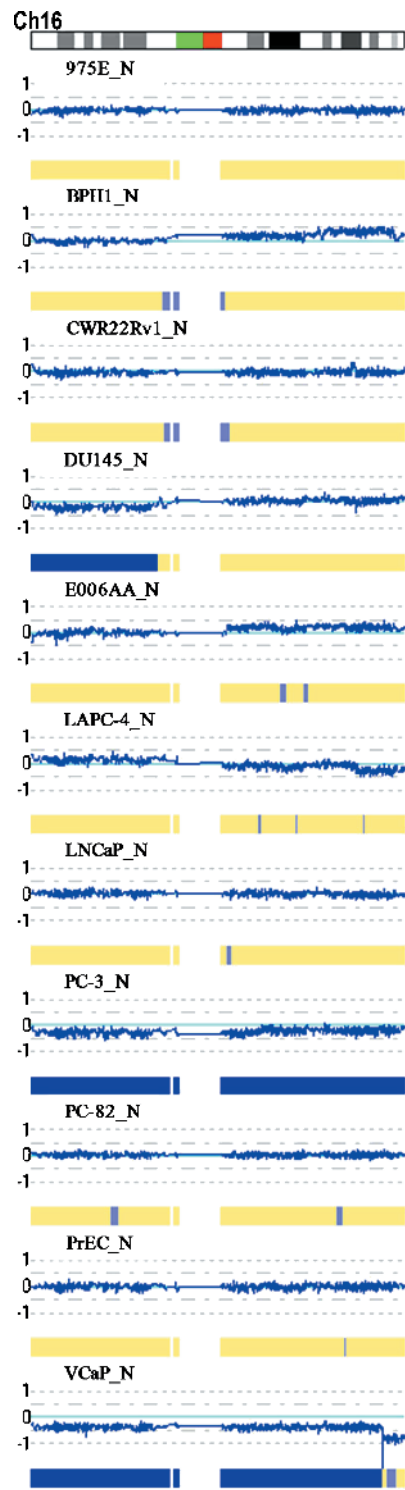

**Figure W16.** Maps of DNA copy number alterations and LOH generated by CNAG2.0 for chromosomes 1 (W1) to X (WX) in prostate cell lines.  $\log_2$  ratios (horizontal dotted lines) are labeled for each of the chromosomes on the left as 1, 0, and  $-1$ , with 0 being the baseline (light blue). Dark blue curve indicates 10-SNP genomic smoothed  $\log_2$  ratios of Nsp probes. Blue bars superimposed on the yellow bars represent LOH likelihood with the gradients as shown in Figure 1. Red arrows indicate DNA copy number variations.

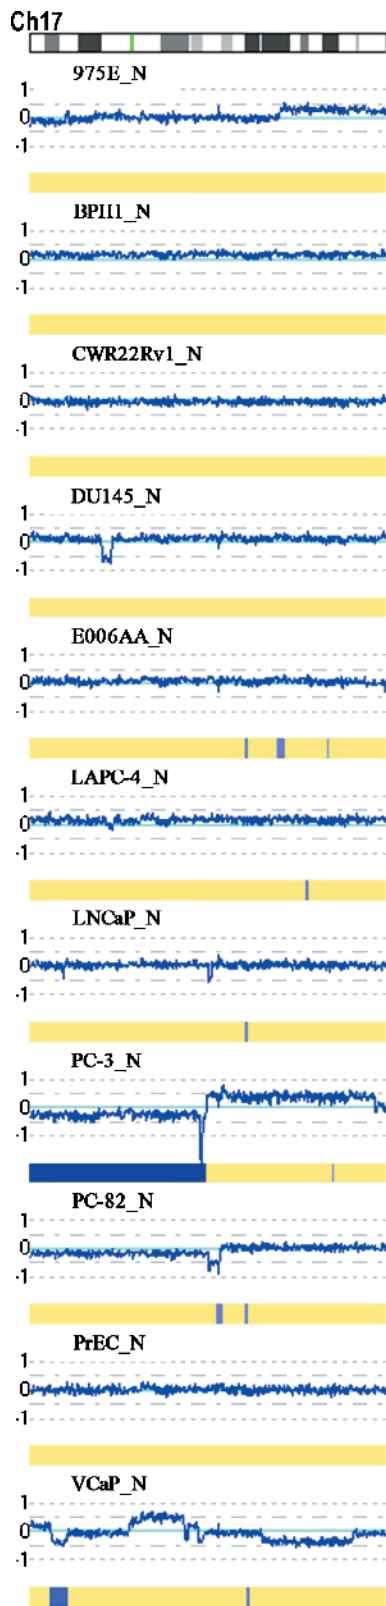

**Figure W17.** Maps of DNA copy number alterations and LOH generated by CNAG2.0 for chromosomes 1 (W1) to X (WX) in prostate cell lines. Log<sub>2</sub> ratios (horizontal dotted lines) are labeled for each of the chromosomes on the left as 1, 0, and -1, with 0 being the baseline (light blue). Dark blue curve indicates 10-SNP genomic smoothed log<sub>2</sub> ratios of Nsp probes. Blue bars superimposed on the yellow bars represent LOH likelihood with the gradients as shown in Figure 1. Red arrows indicate DNA copy number variations.

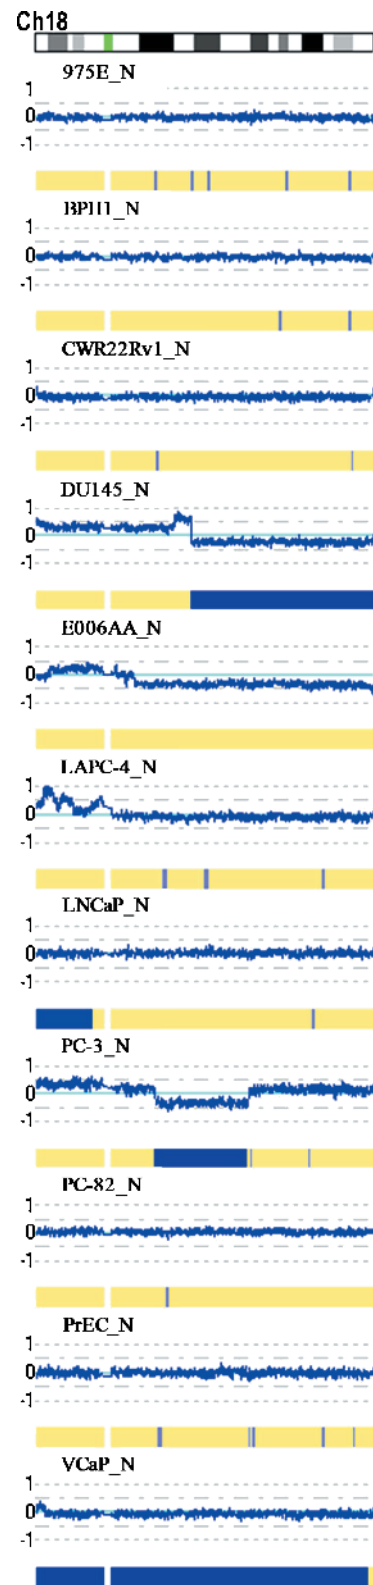

**Figure W18.** Maps of DNA copy number alterations and LOH generated by CNAG2.0 for chromosomes 1 (W1) to X (WX) in prostate cell lines. Log<sub>2</sub> ratios (horizontal dotted lines) are labeled for each of the chromosomes on the left as 1, 0, and -1, with 0 being the baseline (light blue). Dark blue curve indicates 10-SNP genomic smoothed log<sub>2</sub> ratios of Nsp probes. Blue bars superimposed on the yellow bars represent LOH likelihood with the gradients as shown in Figure 1. Red arrows indicate DNA copy number variations.

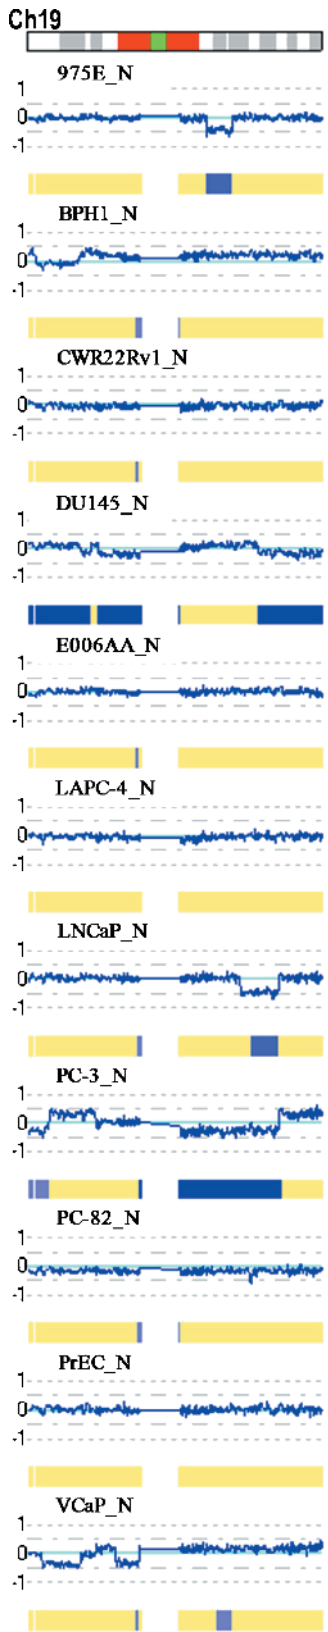

**Figure W19.** Maps of DNA copy number alterations and LOH generated by CNAG2.0 for chromosomes 1 (W1) to X (WX) in prostate cell lines.  $\log_2$  ratios (horizontal dotted lines) are labeled for each of the chromosomes on the left as 1, 0, and  $-1$ , with 0 being the baseline (light blue). Dark blue curve indicates 10-SNP genomic smoothed  $\log_2$  ratios of Nsp probes. Blue bars superimposed on the yellow bars represent LOH likelihood with the gradients as shown in Figure 1. Red arrows indicate DNA copy number variations.

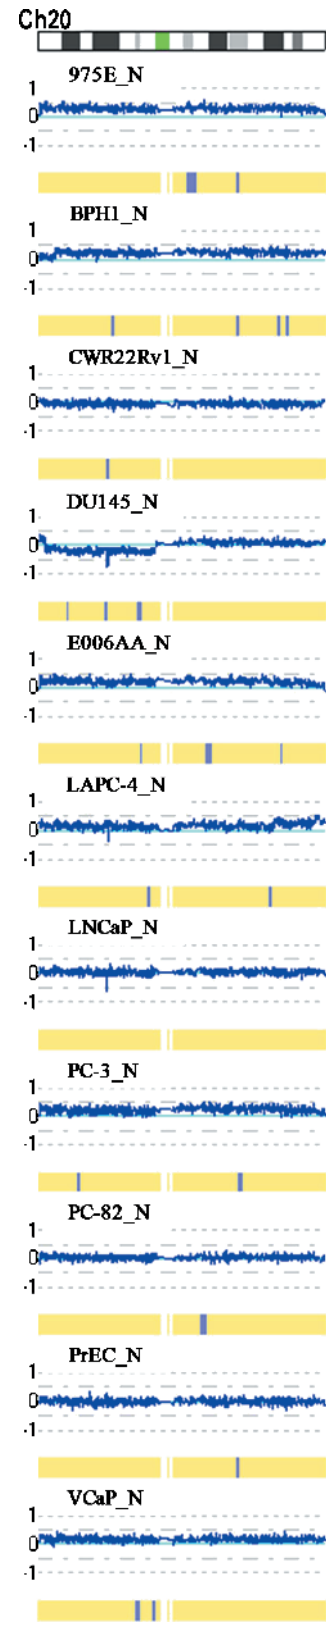

**Figure W20.** Maps of DNA copy number alterations and LOH generated by CNAG2.0 for chromosomes 1 (W1) to X (WX) in prostate cell lines.  $\log_2$  ratios (horizontal dotted lines) are labeled for each of the chromosomes on the left as 1, 0, and  $-1$ , with 0 being the baseline (light blue). Dark blue curve indicates 10-SNP genomic smoothed  $\log_2$  ratios of Nsp probes. Blue bars superimposed on the yellow bars represent LOH likelihood with the gradients as shown in Figure 1. Red arrows indicate DNA copy number variations.

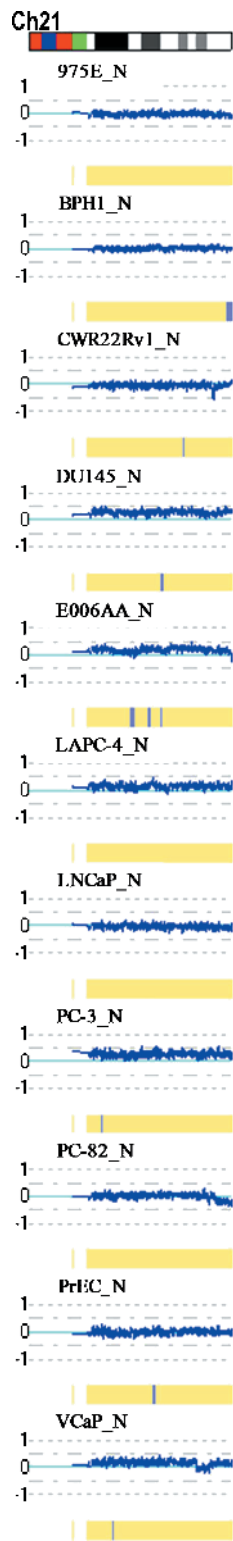

**Figure W21.** Maps of DNA copy number alterations and LOH generated by CNAG2.0 for chromosomes 1 (W1) to X (WX) in prostate cell lines. Log<sub>2</sub> ratios (horizontal dotted lines) are labeled for each of the chromosomes on the left as 1, 0, and -1, with 0 being the baseline (light blue). Dark blue curve indicates 10-SNP genomic smoothed log<sub>2</sub> ratios of Nsp probes. Blue bars superimposed on the yellow bars represent LOH likelihood with the gradients as shown in Figure 1. Red arrows indicate DNA copy number variations.

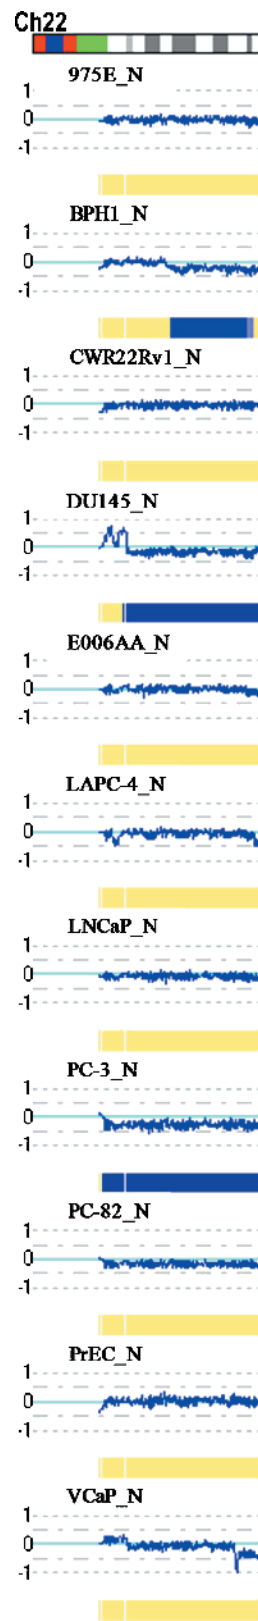

**Figure W22.** Maps of DNA copy number alterations and LOH generated by CNAG2.0 for chromosomes 1 (W1) to X (WX) in prostate cell lines. Log<sub>2</sub> ratios (horizontal dotted lines) are labeled for each of the chromosomes on the left as 1, 0, and -1, with 0 being the baseline (light blue). Dark blue curve indicates 10-SNP genomic smoothed log<sub>2</sub> ratios of Nsp probes. Blue bars superimposed on the yellow bars represent LOH likelihood with the gradients as shown in Figure 1. Red arrows indicate DNA copy number variations.

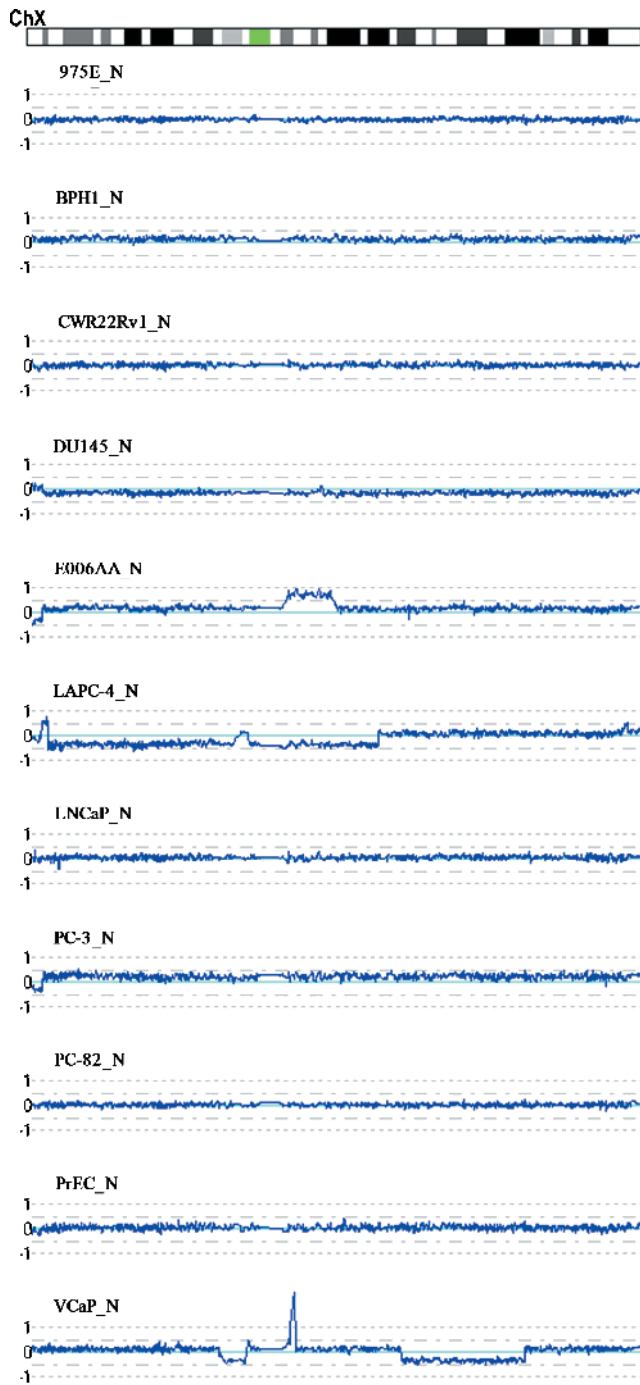

**Figure WX.** Maps of DNA copy number alterations and LOH generated by CNAG2.0 for chromosomes 1 (W1) to X (WX) in prostate cell lines.  $\log_2$  ratios (horizontal dotted lines) are labeled for each of the chromosomes on the left as 1, 0, and  $-1$ , with 0 being the baseline (light blue). Dark blue curve indicates 10-SNP genomic smoothed  $\log_2$  ratios of Nsp probes. Blue bars superimposed on the yellow bars represent LOH likelihood with the gradients as shown in Figure 1. Red arrows indicate DNA copy number variations.
